# Epidemiologic Reviews

*Epidemiologic Reviews* (ISBN 0-19-852989-9; ISSN 0193-936X) is a yearly journal published by Oxford University Press, 2001 Evans Road, Cary, NC 27513-2009 for the Johns Hopkins Bloomberg School of Public Health and is sponsored by the Society for Epidemiologic Research and the International Epidemiological Association. Information for authors appears on the journal's home page at <http://epirev.oxfordjournals.org/>. Authors should consult these instructions before submitting manuscripts.

**Subscription** is on a yearly basis. Prices include dispatch by Standard Air. Airmail rates are available on request. Advance Access contains papers that have recently been accepted but have not yet been included within an issue. Advance Access is updated daily. All institutional and personal subscribers to the *American Journal of Epidemiology* receive *Epidemiologic Reviews* as part of their subscription. Single issues are available for US \$80.00 (£52.00 in the UK and €80.00 in Europe).

The annual rates for the *American Journal of Epidemiology*, which includes *Epidemiologic Reviews* are: Annual Subscription Rate (Volume 38, 1 issue, 2016)

## Corporate

Print and online access: £63/\$96/€96

Print edition only: £58/\$88/€88

Site-wide online access only: £43/\$65/€65

## Institutional

Print and online access: £50/\$77/€77

Print edition only: £46/\$70/€70

Site-wide online access only: £34/\$52/€52

## Personal

Print and online access: £46/\$71/€71

Please note: UK£ rate applies to UK and Rest of World, except US (\$) and Europe (€). There may be other subscription rates available. For a complete listing, please see [www.oxfordjournals.org/our\\_journals/aje/access\\_purchase/price\\_list.html](http://www.oxfordjournals.org/our_journals/aje/access_purchase/price_list.html).

Full prepayment in the correct currency is required for all orders. Payment should be in US dollars for orders being delivered to the USA or Canada; Euros for orders being delivered within Europe (excluding the UK); GBP Sterling for orders being delivered elsewhere (i.e., not being delivered to USA, Canada, or Europe). All orders should be accompanied by full payment and sent to your nearest Oxford Journals office. Subscriptions are accepted for complete volumes only. Orders are regarded as firm, and payments are not refundable. Our prices include dispatch by Standard Air. Claims must be notified within four months of despatch/order date (whichever is later). Subscriptions in the EEC may be subject to European VAT. If registered, please supply details to avoid unnecessary charges. For subscriptions that include online versions, a proportion of the subscription price may be subject to UK VAT. Subscribers in Canada, please add GST to the prices quoted. Personal rate subscriptions are only available if payment is made by personal cheque or credit card, delivery is to a private address, and it is for personal use only.

**Methods of payment:** (i) Check (payable to Oxford University Press, mailed to Oxford University Press, Cashiers Office, Great Clarendon Street, Oxford OX2 6DP, UK) in GB£ Sterling (drawn on a UK bank), US\$ (drawn on a US bank), or EU€.

(ii) Bank transfer to Barclays Bank Plc, Oxford Group Office, Oxford (bank sort code 20-65-18) (UK), overseas only Swift code BARC GB 22 (GB£ Sterling to account no. 70299332, IBAN GB89BARC20651870299332; US\$ to account no. 66014600, IBAN GB27BARC20651866014600; EU€ to account no. 78923655, IBAN GB16BARC20651878923655).

(iii) Credit card (Mastercard, Visa, Switch, or American Express).

**Back issues:** The current year and two previous years' issues are available from Oxford Journals. Previous volumes can be obtained from the Periodicals Service Company at <http://www.periodicals.com/oxford.html> or Periodicals Service Company, 11 Main Street, Germantown, NY 12526, USA. E-mail: [psc@periodicals.com](mailto:psc@periodicals.com). Tel: (518) 537-4700. Fax: (518) 537-5899.

**Contact information:** Journals Customer Service, Oxford University Press, Great Clarendon Street, Oxford OX2 6DP, UK. Telephone (& answer-phone outside normal working hours): +44 (0) 1865 353907, Fax: +44 (0) 1865 353485, E-mail: [jnls.cust.serv@oup.com](mailto:jnls.cust.serv@oup.com). In the US, please contact: Journals Customer Service, Oxford University Press, 2001 Evans Road, Cary, NC 27513, USA, Telephone (& answer-phone outside normal working hours): 800-852-7323 (toll-free in USA/Canada), fax: 919-677-1714, e-mail: [jnlorders@oup.com](mailto:jnlorders@oup.com). In Japan, please contact: Journals Customer Service, Oxford University Press, 4-5-10-8F Shiba, Minato-ku, Tokyo, 108-8386, Japan. Telephone: +81 3 5444 5858, Fax: +81 3 3454 2929, e-mail: [custserv.jp@oup.com](mailto:custserv.jp@oup.com).

**Advertising:** Oxford Journals, Oxford University Press, Great Clarendon Street, Oxford OX2 6DP, UK. Telephone: +44 (0) 1865 353329. Fax: +44 (0) 1865 353774. E-mail: [jnlsadvertising@oup.com](mailto:jnlsadvertising@oup.com).

**Postal information:** *Epidemiologic Reviews* (ISSN 0193-936X) is published annually by Oxford University Press, 2001 Evans Road, Cary, NC 27513-2009. Periodical Postage paid at Cary, NC, and at additional post offices. **Postmaster:** Send address changes to: *Epidemiologic Reviews*, Journals Customer Service Department, Oxford University Press, 2001 Evans Road, Cary, NC 27513-2009.

**Digital object identifiers:** For information on DOIs and to resolve them, please visit [www.doi.org](http://www.doi.org).

**Oxford Journals environmental and ethical policies:** Oxford Journals, a division of Oxford University Press, is committed to working with the global community to bring the highest quality research to the widest possible audience. Oxford Journals will protect the environment by implementing environmentally friendly policies and practices wherever possible. Please see <http://www.oxfordjournals.org/ethicalpolicies.html> for further information on environmental and ethical policies.

**Permissions:** For information on how to request permissions to reproduce articles or information from this journal, please visit [www.oxfordjournals.org/permissions](http://www.oxfordjournals.org/permissions).

**Disclaimer:** Statements of fact and opinion in the articles in *Epidemiologic Reviews* are those of the respective authors and contributors and not of *Epidemiologic Reviews* or Oxford University Press. Neither Oxford University Press nor *Epidemiologic Reviews* make any representation, express or implied, in respect of the accuracy of the material in this journal and cannot accept any legal responsibility or liability for any errors or omissions that may be made. The reader should make her or his own evaluation as to the appropriateness or otherwise of any experimental technique described.

*Epidemiologic Reviews* is printed on acid-free paper that meets the minimum requirements of ANSI Standard Z39.481984 (Permanence of Paper).

**Indexed or abstracted** in *Index Medicus*, *Science Citation Index*, *Current Contents: Life Sciences*, and *BIOSIS Database*.

Copyright © Johns Hopkins Bloomberg School of Public Health 2016.

All rights reserved; no part of this publication may be reproduced, stored in a retrieval system, or transmitted in any form or by any means, electronic, mechanical, photocopying, recording, or otherwise without prior written permission of the publisher or a license permitting restricted copying issued in the UK by the Copyright Licensing Agency Ltd, 90 Tottenham Court Road, London W1P 9HE, or in the USA by the Copyright Clearance Center, 222 Rosewood Drive, Danvers, MA 01923. For those in the USA or Canada not registered with CCC, articles can be obtained by fax in 48 hours by calling WISE for Medicine at 1-800-667-WISE.

**Instructions for authors:** Full instructions for manuscript preparation and submission can be found at: [http://epirev.oxfordjournals.org/for\\_authors/](http://epirev.oxfordjournals.org/for_authors/)

Oxford University Press is a department of the University of Oxford. It furthers the University's objective of excellence in research, scholarship, and education by publishing worldwide.
